# Supplementary material for: DNA damage independent inhibition of NF-κB transcription by anthracyclines
Source: eLife journal article supplement (doi:10.7554/elife.77443), 2022-12-07
Supplement: supp [file elife_poa_e77443_Supplementary_file_1.docx]

List of primer sequences (mostly retrieved form https://pga.mgh.harvard.edu/primerbank/)

| Mouse Primers | | |  |
| --- | --- | --- | --- |
| Gene | **Forward sequence** | **Reverse sequence** | **Primer Bank ID** |
| *Gapdh* | AACTTTGGCATTGTGGAAGG | ACACATTGGGGGTAGGAACA | 6679937a1 |
| *IL1b* | GAAATGCCACCTTTTGACAGTG | GGCTTGTCACTCGAATTTTGAGA | 118130747c1 |
| *Tnf* | CTGAACTTCGGGGTGATCGG | GGCTTGTCACTCGAATTTTGAGA | 133892368c2 |
| *Cxcl10* | GTGGCATTCAAGGAGTACCTC | TGATGGCCTTCGATTCTGGATT | 10946576a1 |
| *IL6* | CCAAGAGGTGAGTGCTTCCC | CTGTTGTTCAGACTCTCTCCCT | 26354667a1 |
| *IL10* | GCTGGACAACATACTGCTAACC | ATTTCCGATAAGGCTTGGCAA | 291575143c2 |
| *Ccl2* | TTAAAAACCTGGATCGGAACCAA | GCATTAGCTTCAGATTTACGGGT | 6755430a1 |
| *Ccl5* | GCGCTCCTGCATCTGCCTCC | CCTTGATGTGGGCACGGGGC | 7305461a1 |
| *Nfkb1* | CCTGGATGACTCTTGGGAAA | TCAGCCAGCTGTTTCATGTC | 6679044a1 |
| *Nfkb2* | GAACAGCCTTGCATCTAGCC | TCCGAGTCGCTATCAGAGGT | 9506921a1 |
| *Nfkbia/Ikba* | TGAAGGACGAGGAGTACGAGC | TTCGTGGATGATTGCCAAGTG | 6754840a1 |
| *Ifnb1* | TGGGTGGAATGAGACTATTGTTG | CTCCCACGTCAATCTTTCCTC | 6754303c3 |
| *Ifna1* | GCCTCGCCCTTTGCTTTACT | CTGTGGGTCTCAGGGAGATCA | Designed by the authors |
| *Ifna4* | TGATGAGCTACTACTGGTCAGC | GATCTCTTAGCACAAGGATGGC | 6754294a1 |
