# Supplementary figures and images for: DNA damage independent inhibition of NF-κB transcription by anthracyclines
Source: eLife journal article supplement (doi:10.7554/elife.77443), 2022-12-07

A

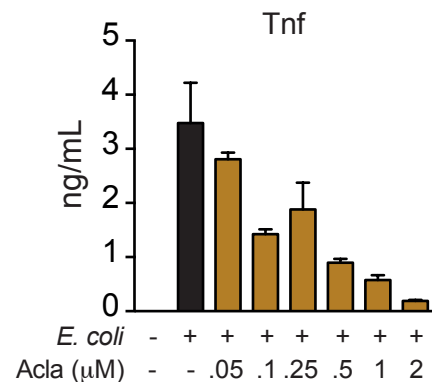

B

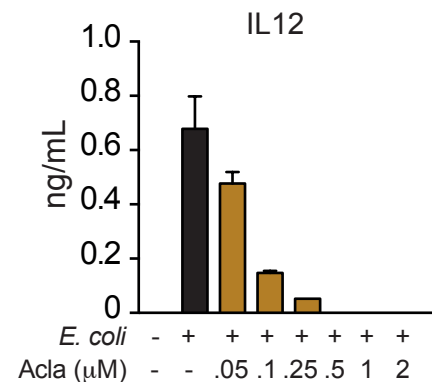

C

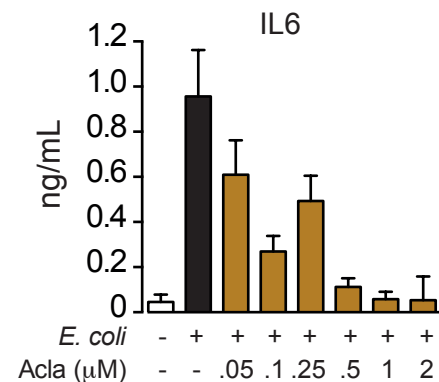

D

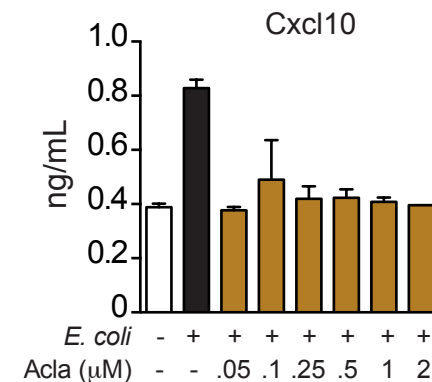

E

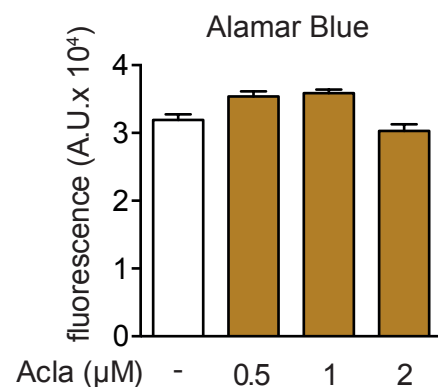

F

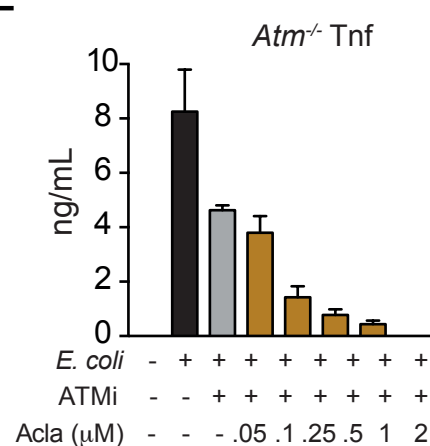

G

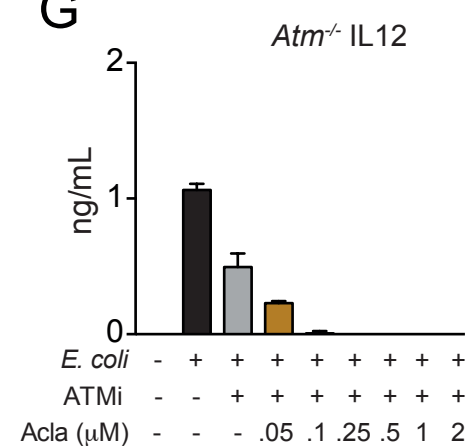

H

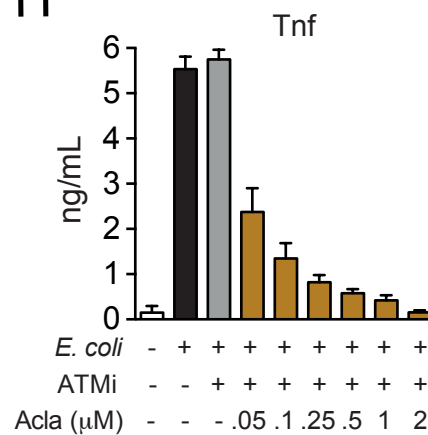

I

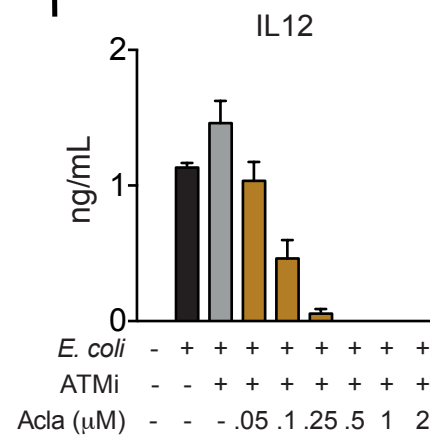

Supplement: supp [file elife-77443-supp-v1.zip]

A

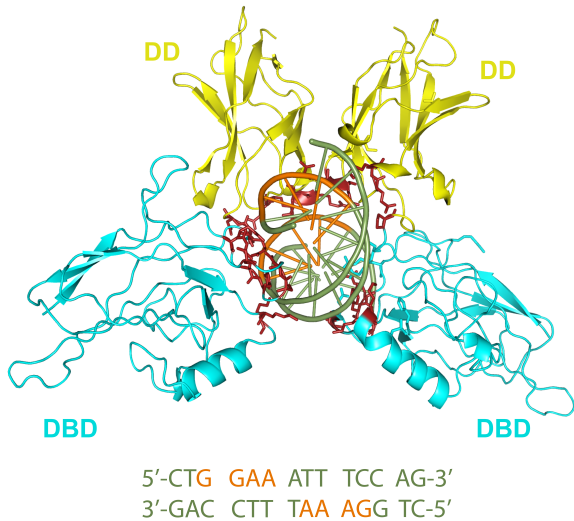

B

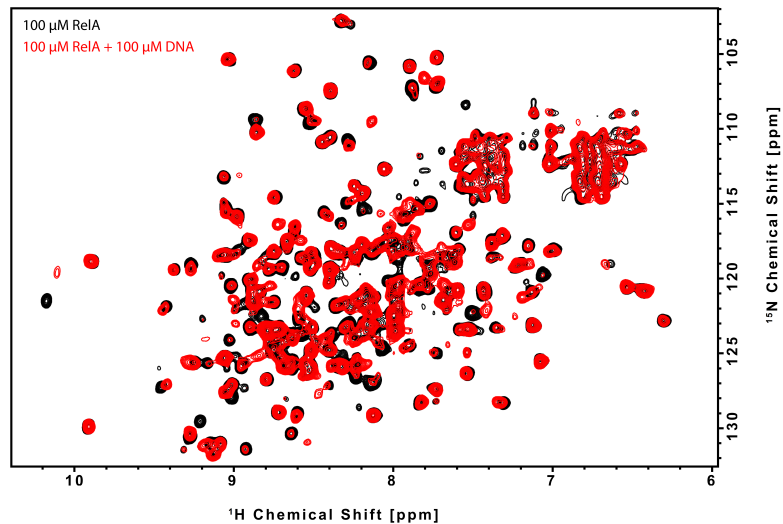

Supplement: supp [file elife-77443-supp-v1.zip]

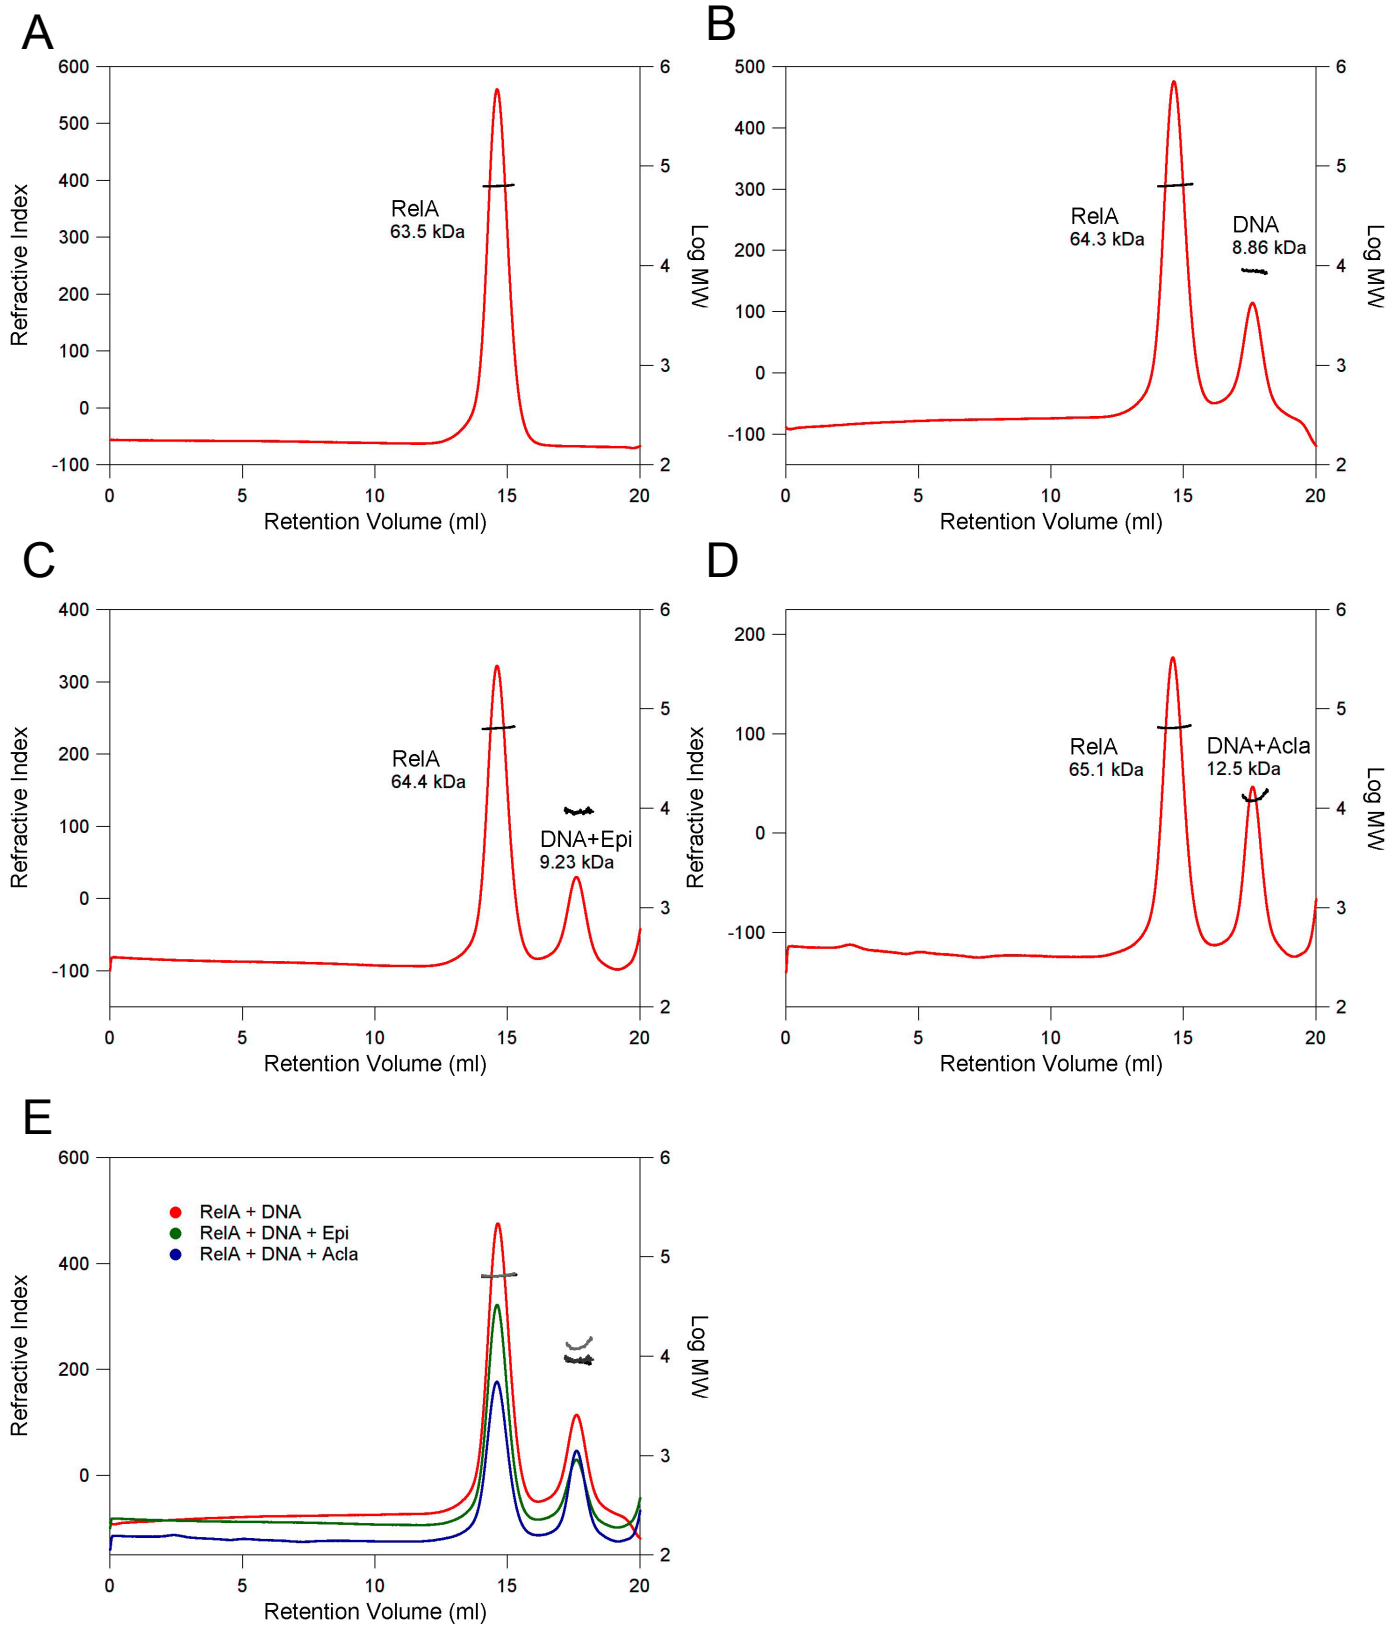

Supplement: supp [file elife-77443-supp-v1.zip]

Figure 5 – figure supplement 4

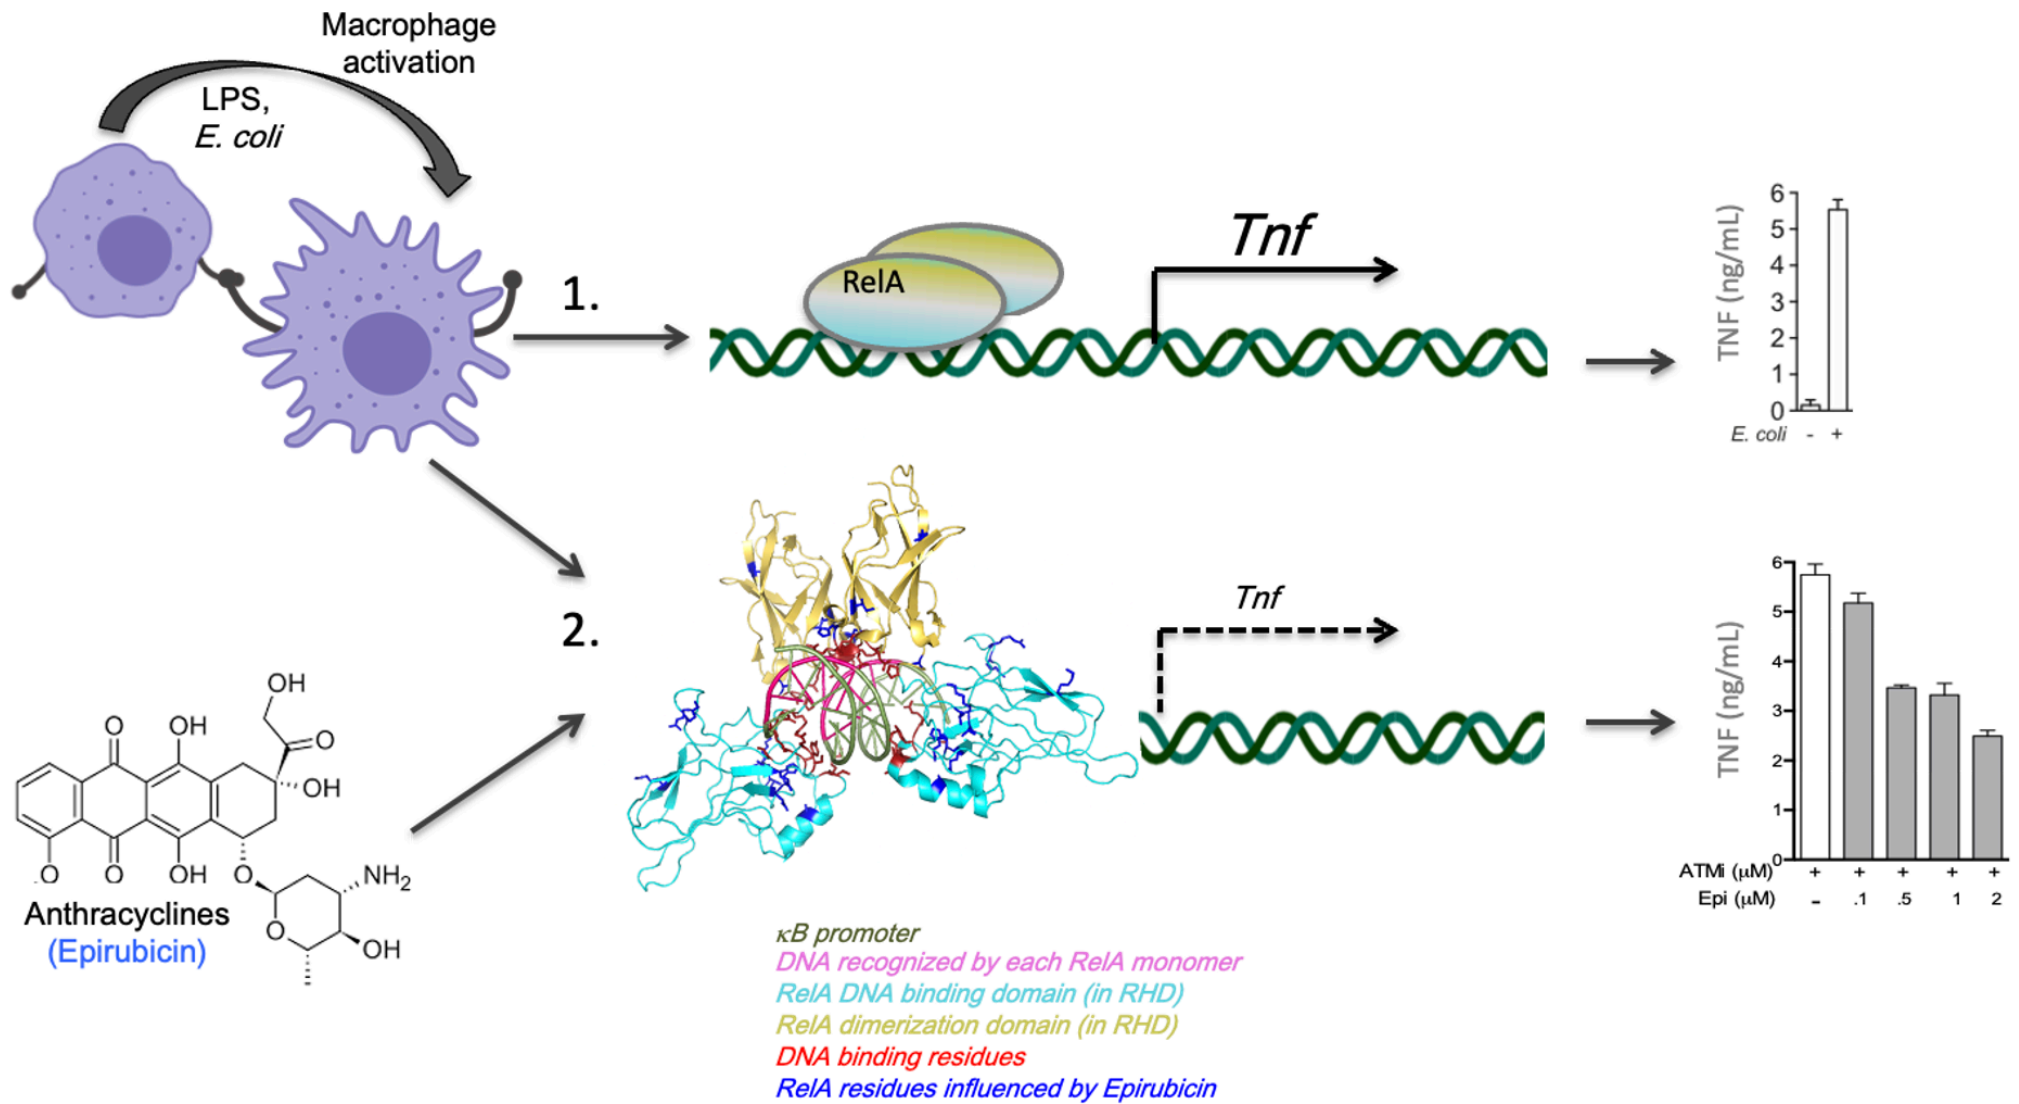

Supplement: supp [file elife-77443-supp-v1.zip]

Figure 5 – figure supplement 2

**A**

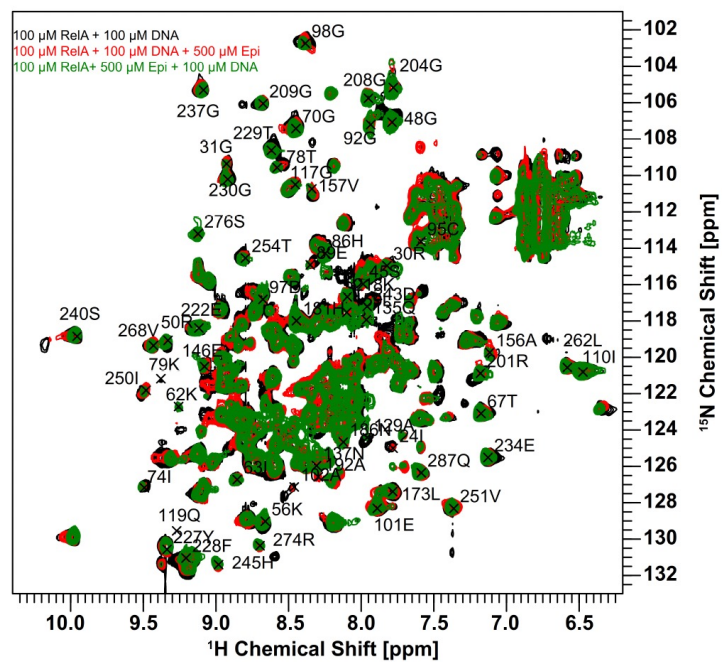

**B**

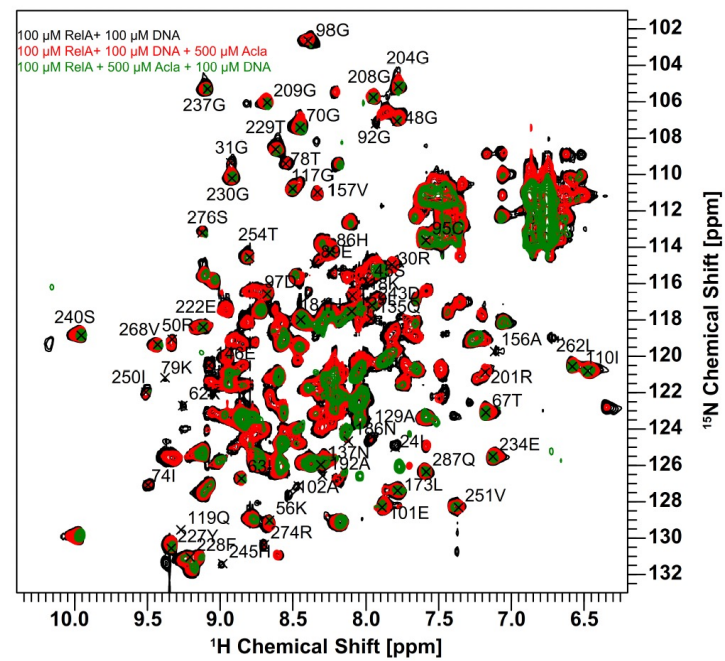

Supplement: supp [file elife-77443-supp-v1.zip]

Figure1 - figure supplement 1

A

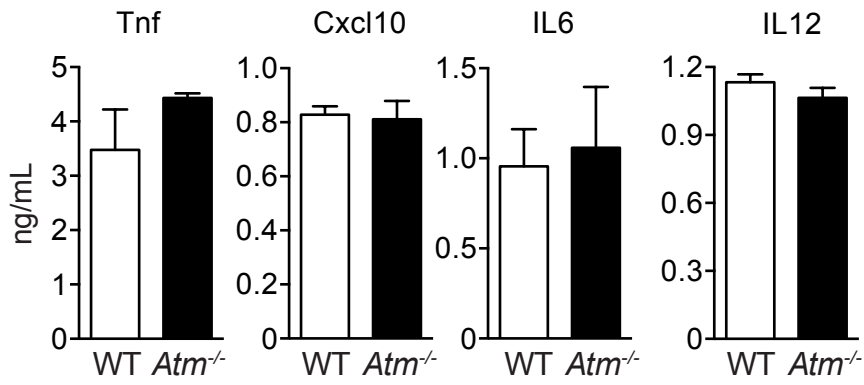

B

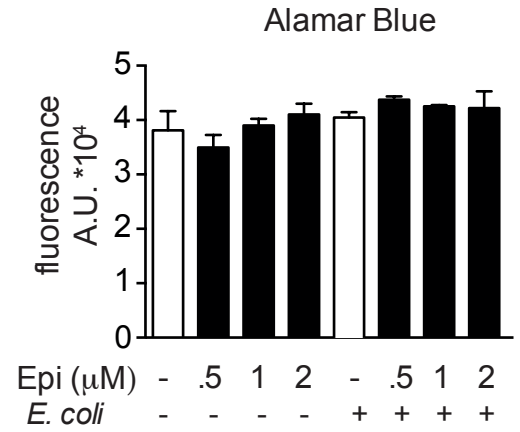

C

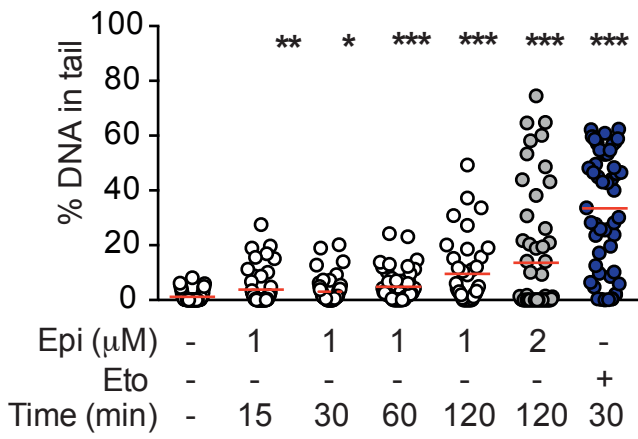

D

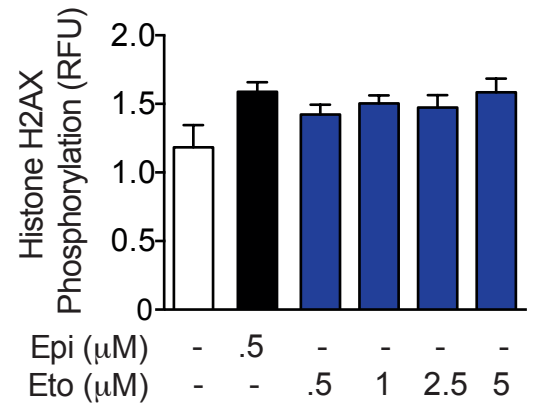

E

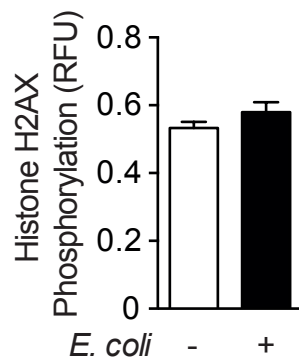

F

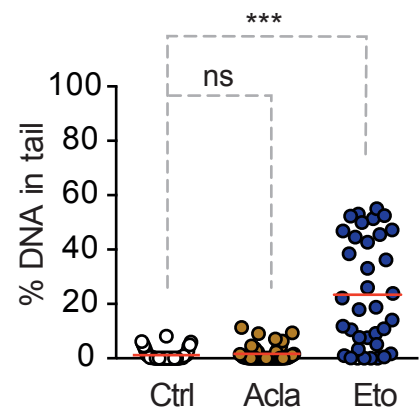

Supplement: supp [file elife-77443-supp-v1.zip]

Figure 5 – figure supplement 3

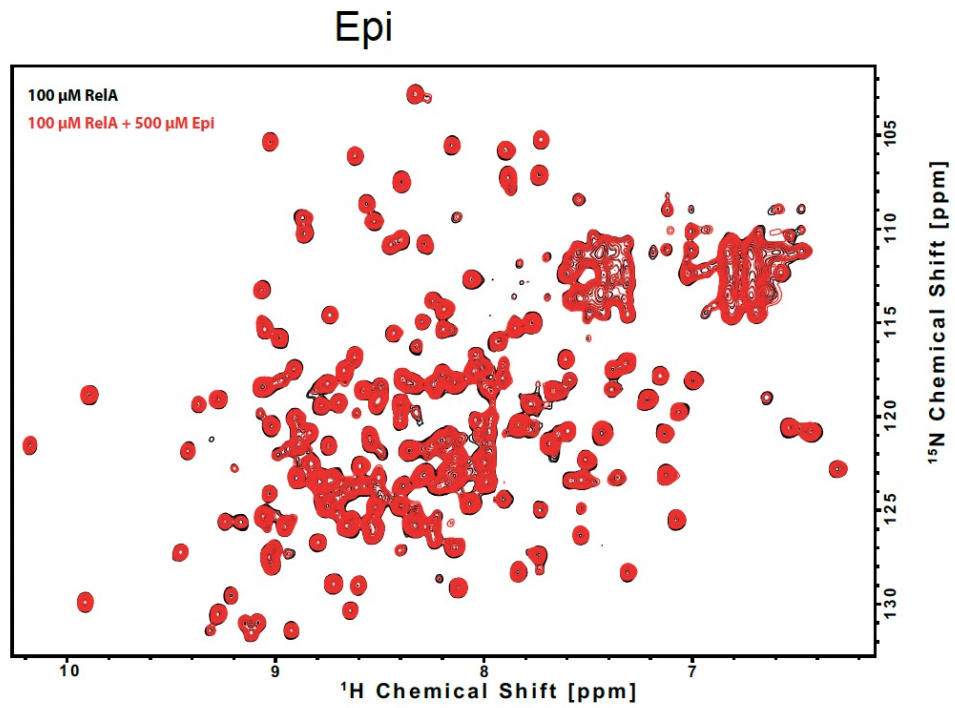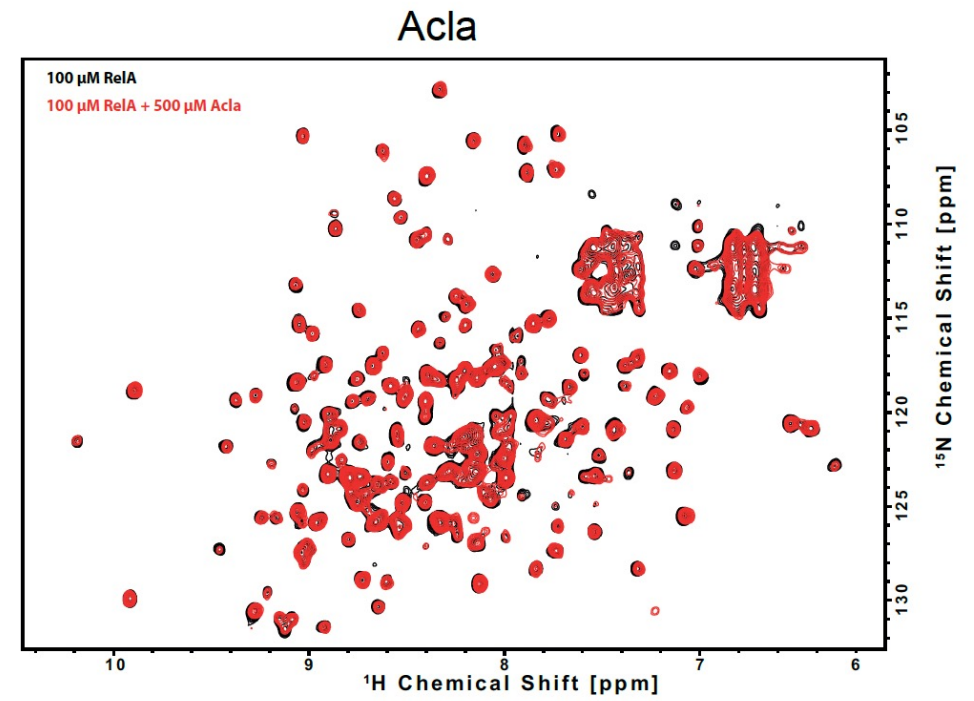

Supplement: supp [file elife-77443-supp-v1.zip]

Figure 3 - figure supplement 1

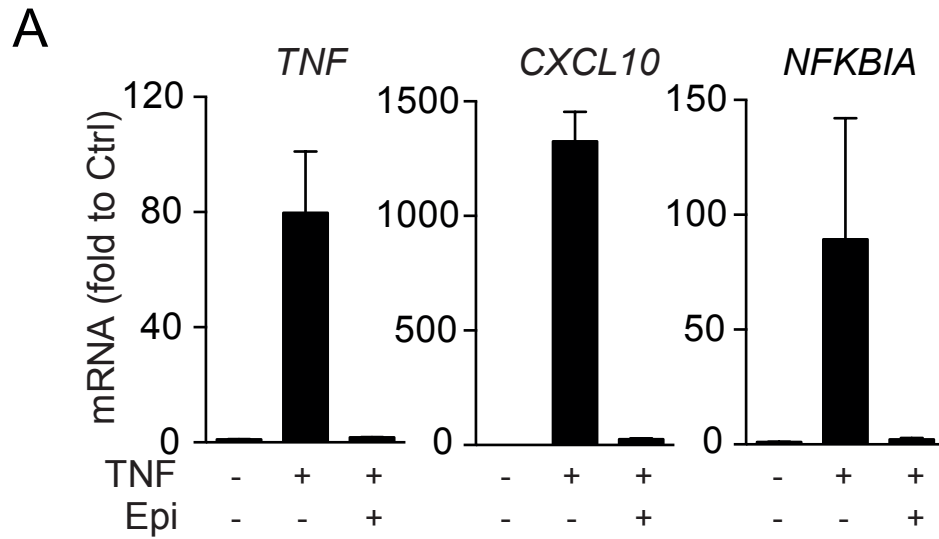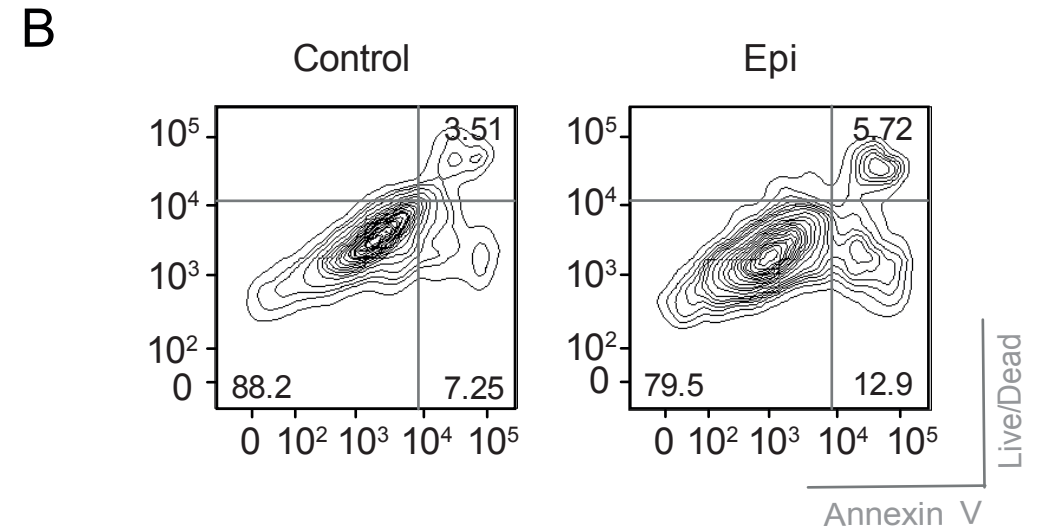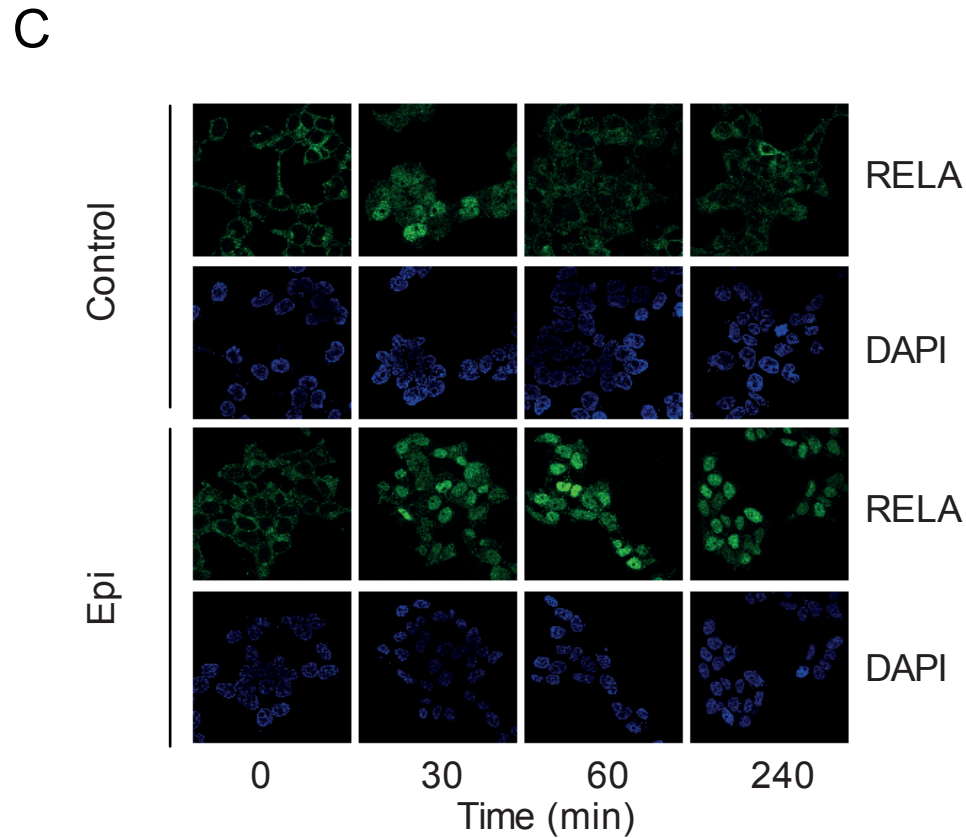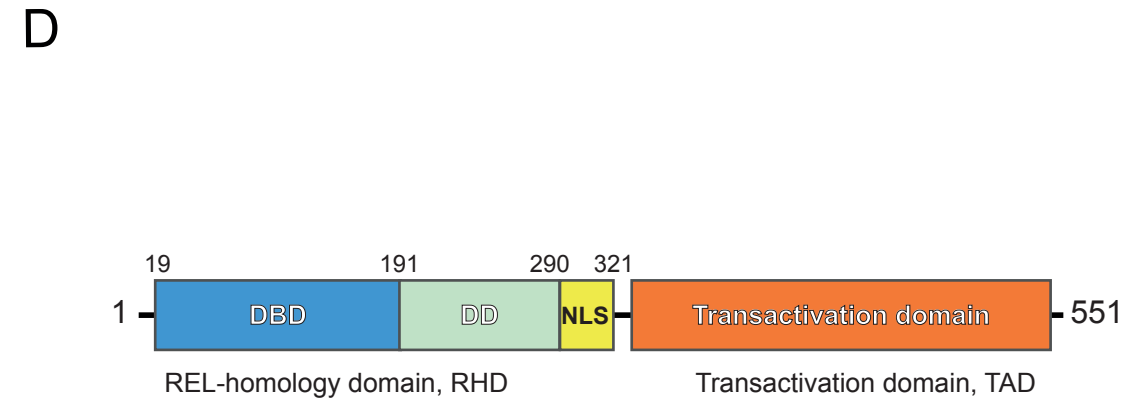

Supplement: supp [file elife-77443-supp-v1.zip]

A

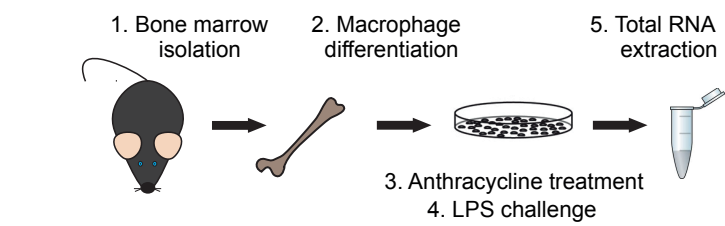

B

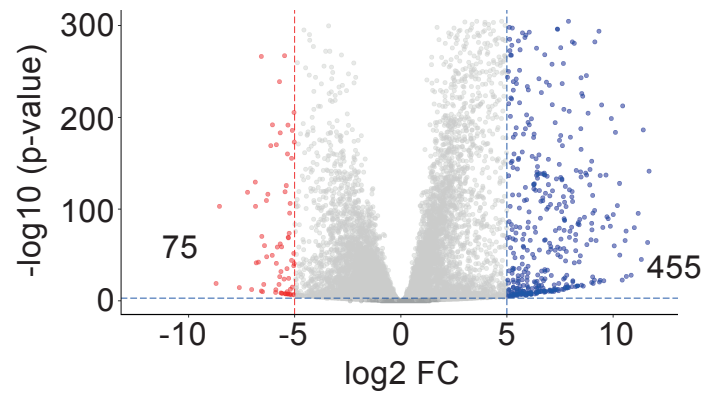

C

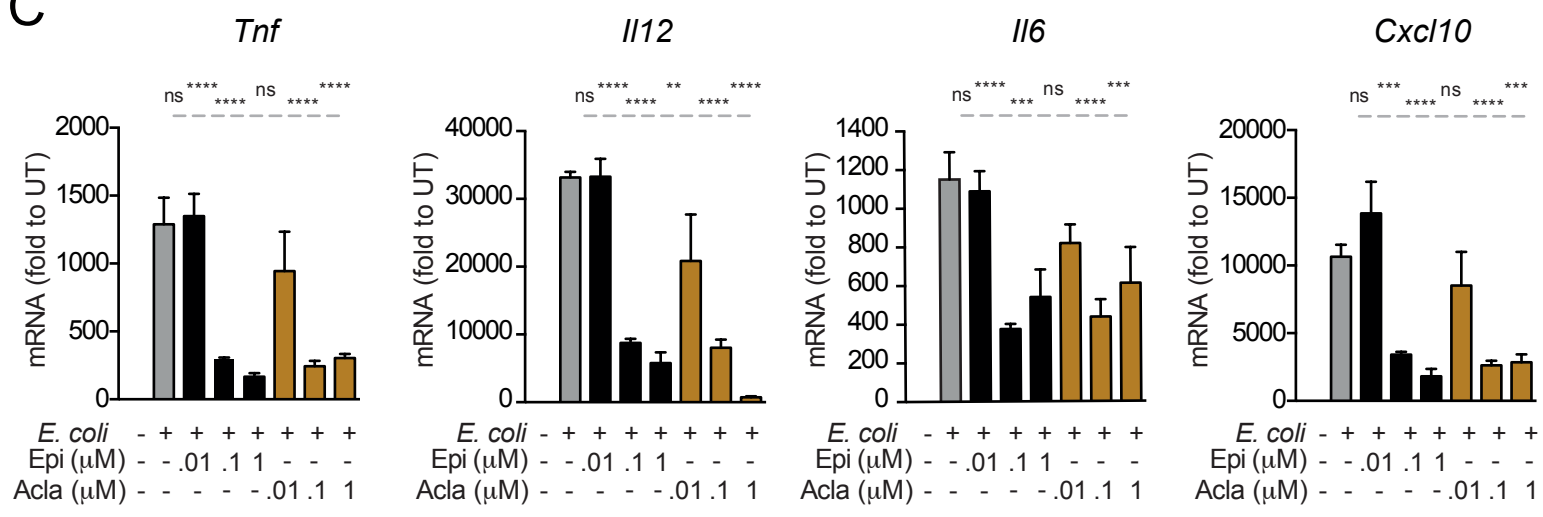

D

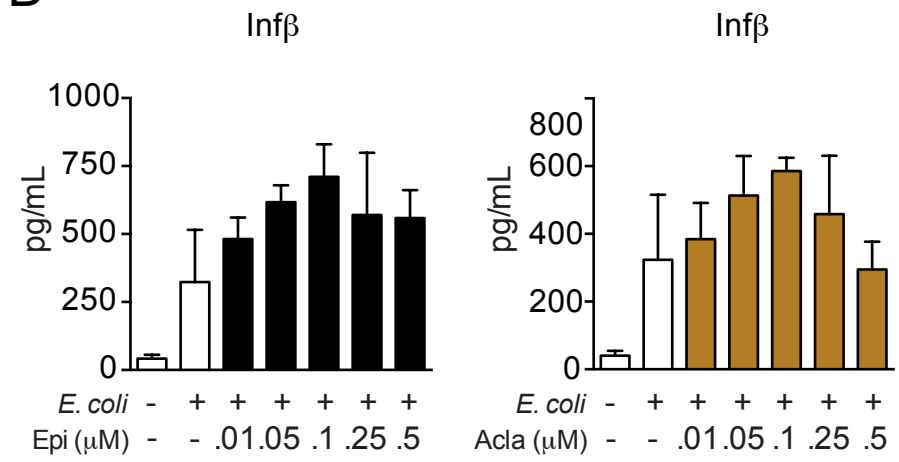

E

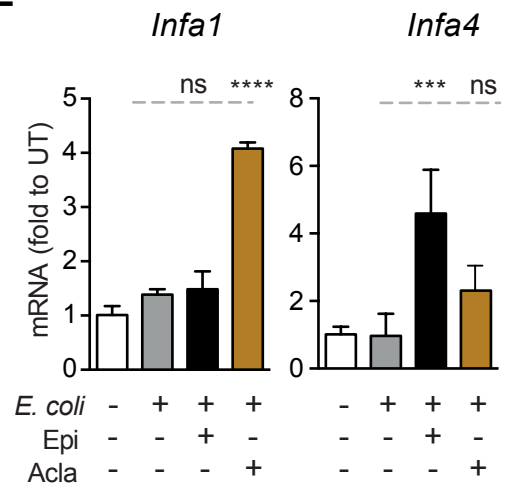

Supplement: supp [file elife-77443-supp-v1.zip]

Figure 2 - figure supplement 2

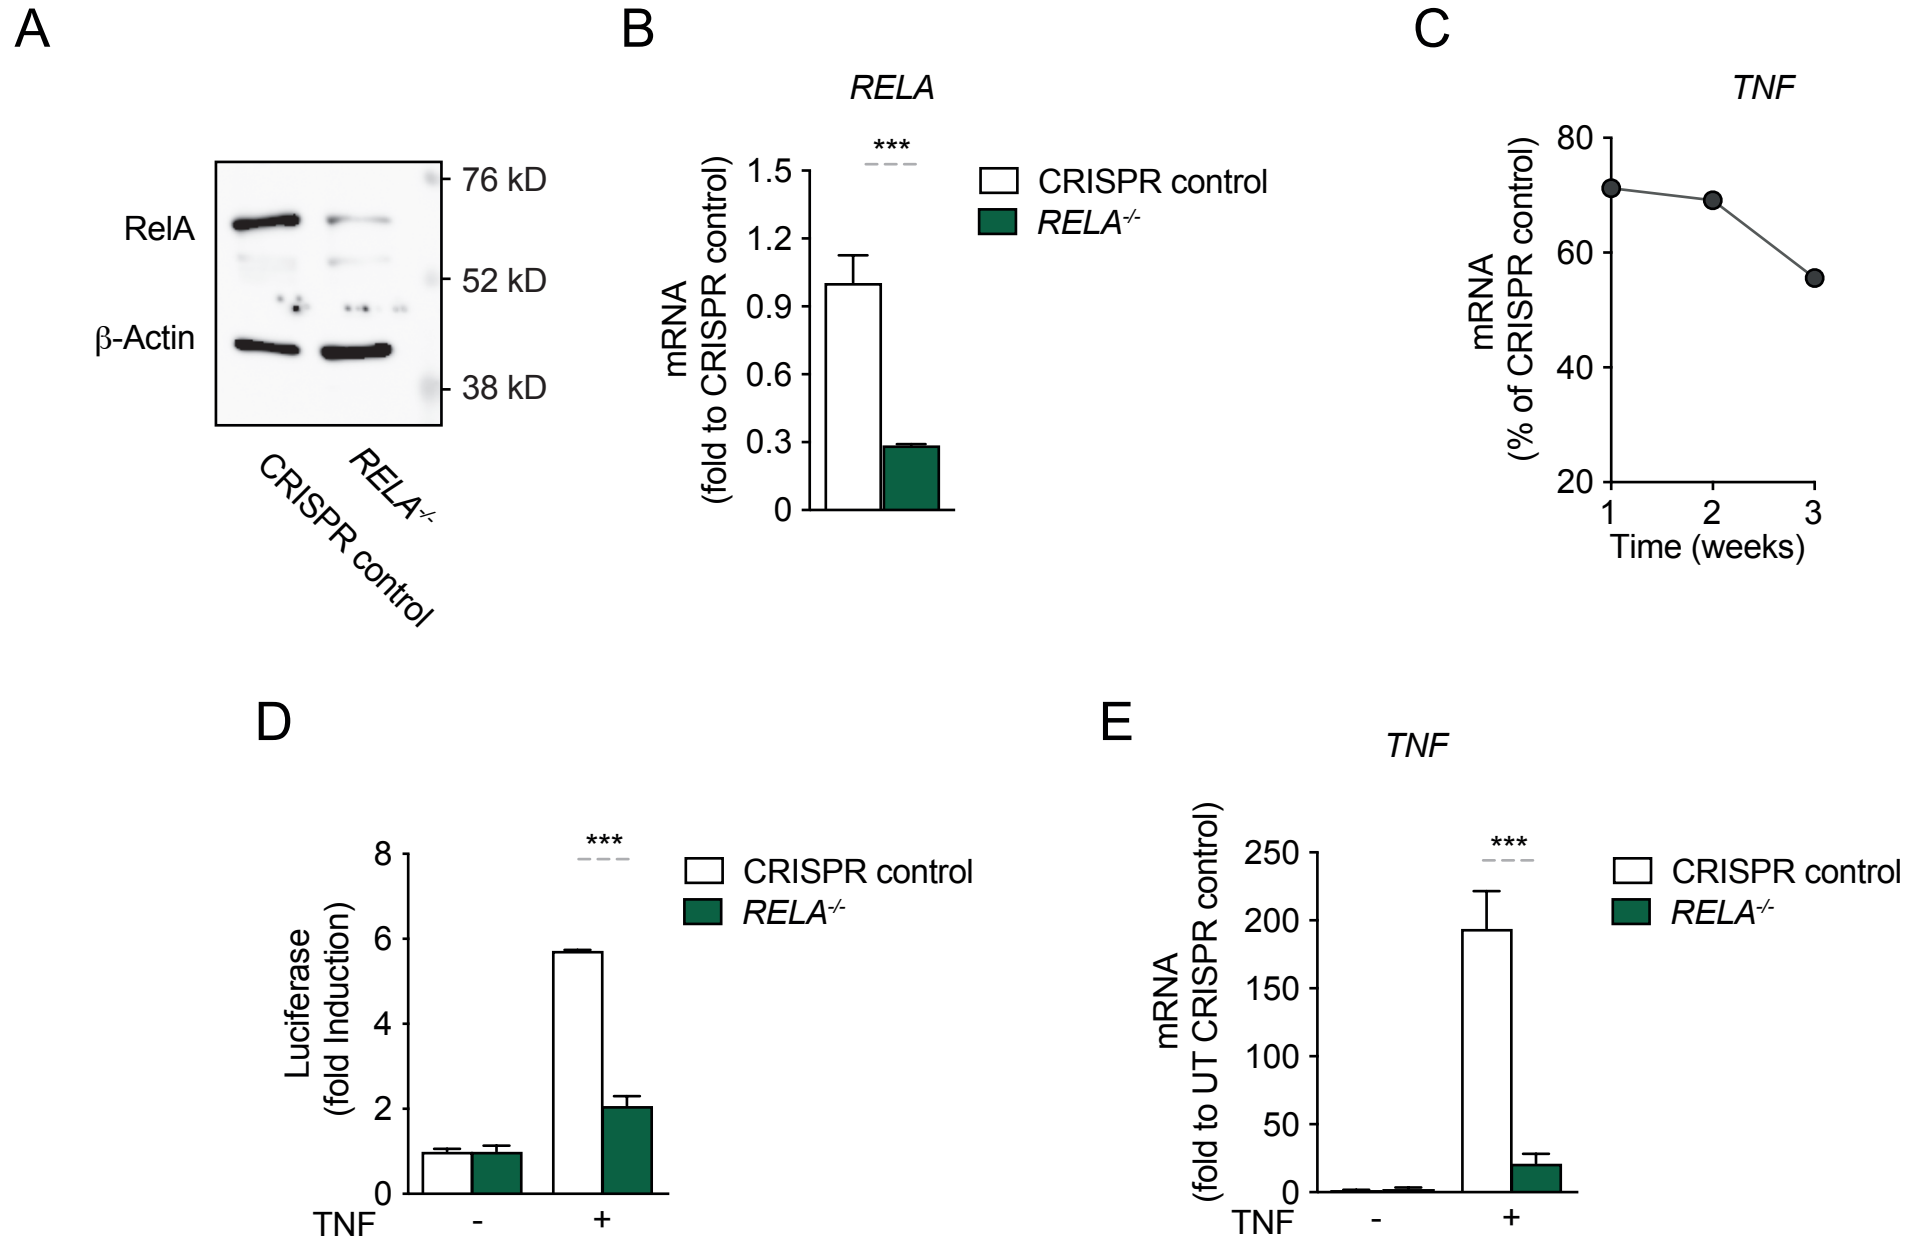

Supplement: supp [file elife-77443-supp-v1.zip]

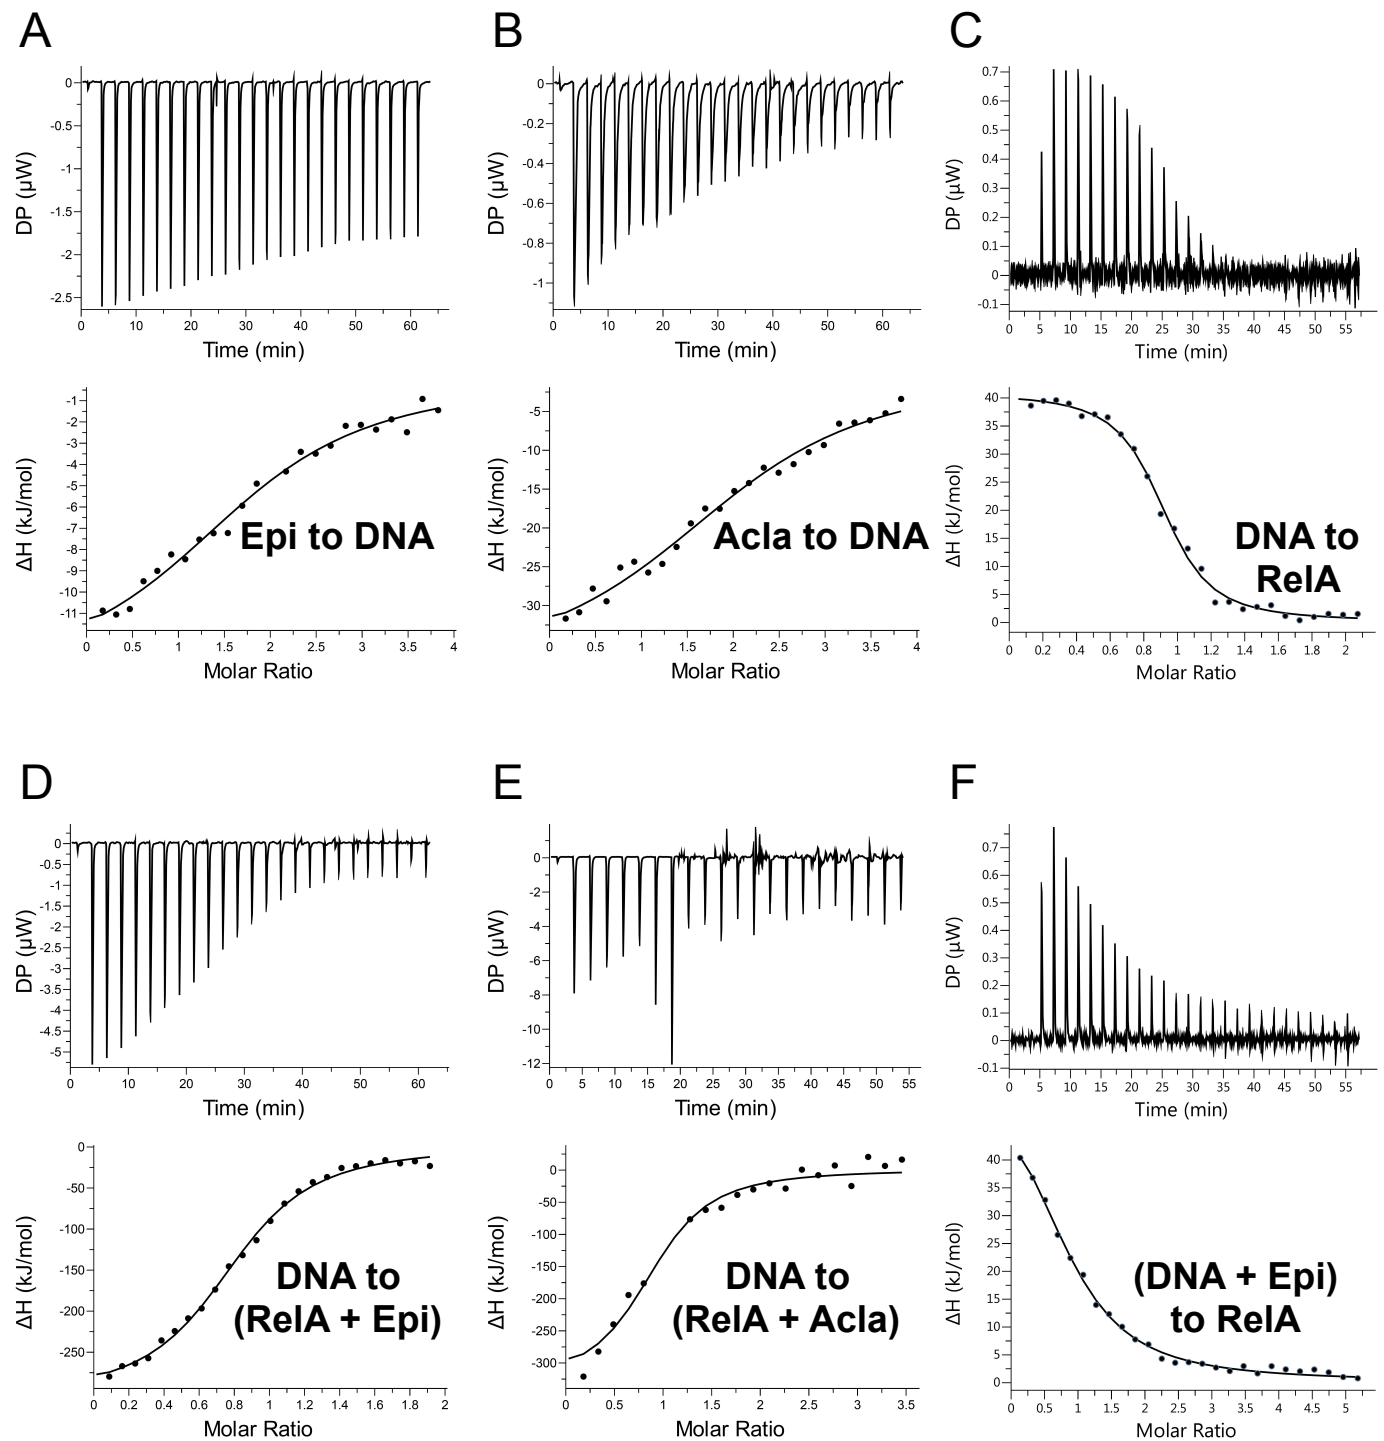

Supplement: supp [file elife-77443-supp-v1.zip]

Figure 5 – figure supplement 1

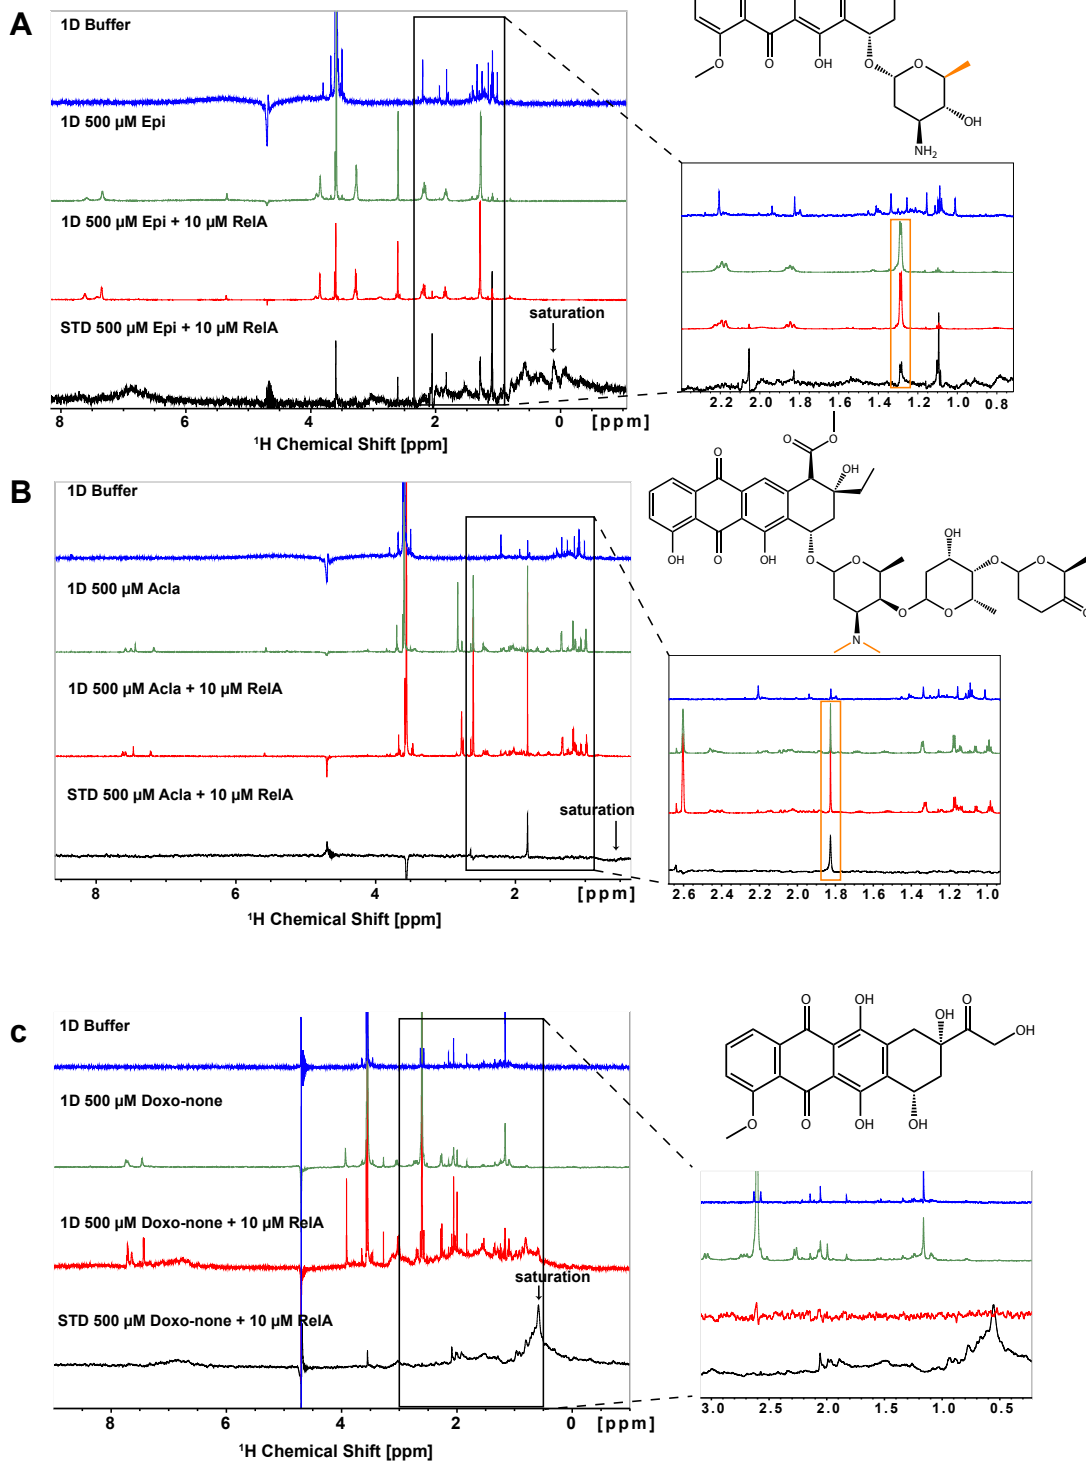

Supplement: supp [file elife-77443-supp-v1.zip]
